# Supplementary material for: Brief communication: Sendai framework for disaster risk reduction – successor warning sign for Paris?
Source: Copernicus journal article supplement (doi:10.5194/nhess-16-2189-2016), 2016-09-30
Supplement: Supplementary file 1 [file nhess-16-2189-2016-supplement.pdf]

Supplement of Nat. Hazards Earth Syst. Sci., 16, 2189–2193, 2016  
<http://www.nat-hazards-earth-syst-sci.net/16/2189/2016/>  
doi:10.5194/nhess-16-2189-2016-supplement  
© Author(s) 2016. CC Attribution 3.0 License.

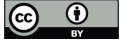

Natural Hazards  
and Earth System  
Sciences  Open Access

*Supplement of*

## **Brief communication: Sendai framework for disaster risk reduction – success or warning sign for Paris?**

**Jaroslav Mysiak et al.**

*Correspondence to:* Jaroslav Mysiak ([jaroslav.mysiak@feem.it](mailto:jaroslav.mysiak@feem.it))

The copyright of individual parts of the supplement might differ from the CC-BY 3.0 licence.

## Supplementary Material

| Target                     | <i>Zero-draft as on 20/10/2014</i> [SFDRR-0]                                                                      | <i>Pre-conference as on 28/01/2015</i><br>[SFDRR-1]                                                                                                                                                                                                                                                                                                                                                                                                                           | <i>Final text released on 18/03/2015</i><br>[SFDRR]                                                                                                                                           |
|----------------------------|-------------------------------------------------------------------------------------------------------------------|-------------------------------------------------------------------------------------------------------------------------------------------------------------------------------------------------------------------------------------------------------------------------------------------------------------------------------------------------------------------------------------------------------------------------------------------------------------------------------|-----------------------------------------------------------------------------------------------------------------------------------------------------------------------------------------------|
| <b>[1] Mortality</b>       | <i>Reduce</i> disaster mortality by [a given percentage in function of number of hazardous events] by 20[xx];     | [a] <i>Substantially reduce</i> disaster mortality [per capita] by 2030 [to achieve a minimum average global mortality from disasters between 2020 and 2030 lower than the average mortality between 2005 and 2015.]<br><br>[b] <i>Substantially reduce</i> disaster mortality [per capita] by 2030. [FN] To achieve this target, the minimum average global mortality from disasters between 2020 and 2030 should be lower than the average mortality between 2005 and 2015. | <i>Substantially reduce</i> global disaster mortality by 2030, aiming to lower average per 100,000 global mortality between 2020-2030 compared to 2005-2015.                                  |
| <b>[2] Affected people</b> | Reduce the number of affected people by [a given percentage in function of number of hazardous events] by 20[xx]. | [a] <i>Substantially reduce</i> the number of affected people per capita at the global level by 2030. [FN] To achieve this target, the minimum average of number of affected people from disasters                                                                                                                                                                                                                                                                            | <i>Substantially reduce</i> the number of affected people globally by 2030, aiming to lower the average global figure per 100,000 between 2020-2030 compared to 2005-2015. [FN] Categories of |

---

between 2020 and 2030 should be lower than the average number of affected people between 2005 and 2015. affected people will be elaborated in the process for post Sendai work decided by the Conference.

[b] *Substantially reduce* the number of affected people per capita at the global level by 2030. [FN] Categories of affected people will be considered/elaborated/agreed in the process for post Sendai work to be decided upon by the Conference.

---

**[3] Economic loss** *Reduce* disaster economic loss by [a given percentage in function of number of hazardous events] by 20[xx]. *Reduce* direct disaster economic loss in relation to global gross domestic product (GDP) by 2030. *Reduce* direct disaster economic loss in relation to global gross domestic product (GDP) by 2030.

---

**[4] Critical infrastructure** *Reduce* disaster damage to health and educational facilities by [a given percentage in function of number of hazardous events] by 20[xx]. [a] *Substantially reduce* disaster damage to critical infrastructure, *particularly* health and educational facilities [by a given percentage] by 2030. *Substantially reduce* disaster damage to critical infrastructure and disruption of basic services, among them health and educational facilities, including through developing their resilience by 2030.

[b] *Substantially reduce* disaster damage to critical infrastructure and disruption of

---

basic services, among them health and educational facilities, including through developing their resilience by 2030.

---

[5] **DRR strategies** *Increase* number of countries with national and local strategies by [a given percentage] by 20[xx].

*Substantially increase* the number of countries with national and local disaster risk reduction strategies by 2020. [Increase by a given percentage accordingly with national capacities the number of national instruments to reduce direct disaster economic loss by 2030].

*Substantially increase* the number of countries with national and local disaster risk reduction strategies by 2020.

---

[6] **International cooperation** -

[a] [*Substantially*] enhance international cooperation in support of disaster risk reduction [[in/to] developing countries/from developed to developing countries], including through providing adequate, [additional and] timely and predictable financial resources, technical assistance, technology transfer, capacity building and training programmes, [in order to enhance resilience to disasters and implement the framework/for the implementation of the framework] [by

*Substantially* enhance international cooperation to developing countries through adequate and sustainable support to complement their national actions for implementation of this framework by 2030

---

xx % by 2030].

[b] Enhance international cooperation to mobilize [a variety of necessary resources of its implementation of the framework particularly by developing] [adequa-te/effective] and sustainable support for the implementation of the framework particularly [by/in] developing countries. [FN] To achieve this target, minimum average international cooperation to developing countries for disaster risk reduction between 2020 and 2030 should be higher than average international cooperation between 2005 and 2015

---

**[7] Early -  
warning  
systems and  
risk  
assessments**

[a] Substantially increase the availability of and access to multi-hazard early warning systems and disaster risk information and assessments to the people by 2030. Substantially increase the availability of and access to multi-hazard early warning systems and disaster risk information and assessments to the people by 2030.

[b] To develop specific multi-hazard early warning systems and to increase

---

availability and access of people to  
information related to disaster risk.

---
